# Supplementary material for: An essential dual-function complex mediates erythrocyte invasion and channel-mediated nutrient uptake in malaria parasites
Source: eLife. 2017 Feb 21;6:e23485. doi: 10.7554/eLife.23485 (PMC5349850; doi:10.7554/eLife.23485)
Supplement: Supplementary file 1. — Underlined sequences represent overhangs for In-Fusion cloning (Clontech). DOI: http://dx.doi.org/10.7554/eLife.23485.013 [file elife-23485-supp1.xlsx]

## Sheet: Sheet1
Supplementary file 1. Primers used in this study. Underlined sequences represent overhangs for In-Fusion cloning (Clontech).
ID	Sequence (5' to 3')	Use	Orientation
R2gRNA_312F	TAAGTATATAATATTTTACATATGAAATCATTATAGTTTTAGAGCTAGAA	sgRNA for rhoph2 positive control and knockout transfections	F
R2gRNA_312R	TTCTAGCTCTAAAACTATAATGATTTCATATGTAAAATATTATATACTTA	sgRNA for rhoph2 positive control and knockout transfections	R
R2gRNA_402F	TAAGTATATAATATTAAAGGATCTCAAAATACTGAGTTTTAGAGCTAGAA	sgRNA for rhoph2 positive control and knockout transfections	F
R2gRNA_402R	TTCTAGCTCTAAAACTCAGTATTTTGAGATCCTTTAATATTATATACTTA	sgRNA for rhoph2 positive control and knockout transfections	R
R2gRNA_105F	TAAGTATATAATATTTATGGAGCTGAGCAAGGTGTGTTTTAGAGCTAGAA	sgRNA for rhoph2 N-terminal 3HA-DDD tag	F
R2gRNA_105R	TTCTAGCTCTAAAACACACCTTGCTCAGCTCCATAAATATTATATACTTA	sgRNA for rhoph2 N-terminal 3HA-DDD tag	R
R2gRNA_5507F	TAAGTATATAATATTTCTTCACTGATTTCTTTGTAGTTTTAGAGCTAGAA	sgRNA for rhoph2 3' introduction of glmS and 3HA-DDD tag	F
R2gRNA_5507R	TTCTAGCTCTAAAACTACAAAGAAATCAGTGAAGAAATATTATATACTTA	sgRNA for rhoph2 3' introduction of glmS and 3HA-DDD tag	R
R3gRNA_1093F	TAAGTATATAATATTATATTAGTTTTTATTAAGGGGTTTTAGAGCTAGAA	sgRNA for rhoph3 positive control and knockout transfections	F
R3gRNA_1093R	TTCTAGCTCTAAAACCCCTTAATAAAAACTAATATAATATTATATACTTA	sgRNA for rhoph3 positive control and knockout transfections	R
R3gRNA_1178F	TAAGTATATAATATTATATAAAGTTTTTCTTTCTTGTTTTAGAGCTAGAA	sgRNA for rhoph3 positive control and knockout transfections	F
R3gRNA_1178R	TTCTAGCTCTAAAACAAGAAAGAAAAACTTTATATAATATTATATACTTA	sgRNA for rhoph3 positive control and knockout transfections	R
R3gRNA_234F	TAAGTATATAATATTTGGGGAAAAGATGTATTCGCGTTTTAGAGCTAGAA	sgRNA for rhoph3 N-terminal 3HA-DDD tag	F
R3gRNA_234R	TTCTAGCTCTAAAACGCGAATACATCTTTTCCCCAAATATTATATACTTA	sgRNA for rhoph3 N-terminal 3HA-DDD tag	R
R3gRNA_4031F	TAAGTATATAATATTCAATTCATTTTCAGAAGTAAGTTTTAGAGCTAGAA	sgRNA for rhoph3 3' introduction of glmS and 3HA-DDD tag	F
R3gRNA_4031R	TTCTAGCTCTAAAACTTACTTCTGAAAATGAATTGAATATTATATACTTA	sgRNA for rhoph3 3' introduction of glmS and 3HA-DDD tag	R
P1	CTATAGAATACTCGCGGCCGATGATAAAAGTGACAATATTT	homology arm construction, rhoph2 positive control and knockout transfections	F
P2	TTTTACCGTTCCATGGAGAAACGGATTCATAATATCTACTAC	homology arm construction, rhoph2 positive control and knockout transfections	R
P3	CTATAGAATACTCGCGGCCGTCCTTTTTAGATTTTGTGG	homology arm construction, rhoph3 positive control and knockout transfections	F
P4	TTTTACCGTTCCATGGACTGTTAGTCATAAATTTTTTAAAATTAT	homology arm construction, rhoph3 positive control and knockout transfections	R
P5	AGAATGATTAATAACTCGAGGGATATGGCAGCTTAATGTTCGTTT	PcDHFR-TS 3'UTR	F
P6	ATAATTGTCCCGGGGGTACCCTACCCTGAAGAAGAAAAGTCCGA	PcDHFR-TS 3'UTR for rhoph2 knockout	R
P7	GAATATAACCCGGGGGTACCCTACCCTGAAGAAGAAAAGTCCGA	PcDHFR-TS 3'UTR for rhoph3 knockout	R
P8	GTTTATATTTAAGTTTGAAAGGATCTCA	PCR check for wild-type, rhoph2 positive control and knockout	F
P9	CGCTGTACTTGTCGCTCAAGGG	PCR check for integration, rhoph2 positive control and knockout	F
P10	CTCATTTTTTGAGACAGCTCAATTCT	PCR check for integration and pL6 episomes, rhoph2 knockout	F
P11	CTTTCATATTAACATAATATAAATCATCAG	PCR check for wild-type and integration, rhoph2 positive control and knockout	R
P12	CTTTCTTGAAACGGTTGTCCCTTTG	PCR check for pL6 episomes, rhoph2 knockout	R
P13	AGGAAATGGCCCAGACGCTGGA	PCR check for wild-type and integration, rhoph3 positive control and knockout	F
P14	TGTTGTGTGGAATTGTGAGCGGAT	PCR check for pL6 episomes, rhoph3 knockout and N-terminal 3HA-DDD tag	F
P15	CAATATTTGTGAAATTCCTTAACTGGG	PCR check for wild-type, rhoph3 positive control and knockout	R
P16	GTACTTATGGAACTCTTTCACAGGA	PCR check for integration, rhoph3 positive control	R
P17	TCTGGGACACAGCGACGATGCAG	PCR check for integration and pL6 episomes, rhoph3 knockout	R
P18	TATGGAGCTGAGCAAGGTGTTGG	PCR check for wild-type, rhoph2 N-terminal 3HA-DDD tag	F
P19	TACGGCGCAGAACAGGGCGTC	PCR check for integration and pL6 episomes, rhoph2 N-terminal 3HA-DDD tag	F
P20	GTAACATCACTCTCGGAACCAGCA	PCR check for wild-type and integration, rhoph2 N-terminal 3HA-DDD tag	R
P21	TGAAGCACTGCACGCCGTAGGT	PCR check for pL6 episomes, rhoph2 N-terminal 3HA-DDD tag	R
P22	ATGCGTAGTAAGCATTTAGTAACATTA	PCR check for wild-type and integration, rhoph3 N-terminal 3HA-DDD tag	F
P23	TTACAAAACCGGCGAATACATCTTTT	PCR check for wild-type, rhoph3 N-terminal 3HA-DDD tag	R
P24	AATCAGACTGATAAAGACGTCCTTG	PCR check for integartion and pL6 episomes, rhoph3 N-terminal 3HA-DDD tag	R
P25	ATCCAATGGCCCCTTTCCGCGGGTGATATATCACAAATGAACTTATTAGA	homology arm construction, rhoph2 glmS and C-terminal 3HA-DDD tag	F
P26	ATTATTTTTACCGTTCCATGGATACACGAAACATTTATGTTGCAAAAAA	homology arm construction, rhoph2 glmS and C-terminal 3HA-DDD tag	R
P27	ATCCAATGGCCCCTTTCCGCGGTTTTCACCGCCTTATACAACTTCGA	homology arm construction, rhoph3 glmS and C-terminal 3HA-DDD tag	F
P28	ATTATTTTTACCGTTCCATGGTACATTTTATTATTTTACATTTTATTATTCC	homology arm construction, rhoph3 glmS and C-terminal 3HA-DDD tag	R
P29	TCCTGAAGTCGTCCGGCGCCTACCCATACGATGTTCCAGATTACG	homology arm construction, rhoph2 C-terminal 3HA-DDD tag	F
P30	GCGAGAACGAGCTCGGCGCCTACCCATACGATGTTCCAGATTACG	homology arm construction, rhoph3 C-terminal 3HA-DDD tag	F
P31	CATCATCCTCGGCGCCTCATCGCCGCTCCAGAATCTCAAAGC	homology arm construction, rhoph2 and rhoph3 C-terminal 3HA-DDD tag	R
P32	TTAAGATCCGTGATATGGAATATTTTTC	PCR check for wild-type and integration, rhoph2 glmS and C-terminal 3HA-DDD tag	F
P33	TAATATTATTATATTTAACTATATACTATGG	PCR check for pL6 episomes, rhoph2 and rhoph3 glmS and C-terminal 3HA-DDD tag	F
P34	AACTTTCAAATTGTGTTTGACACTAGA	PCR check for wild-type, rhoph2 glmS and C-terminal 3HA-DDD tag	R
P35	TTGAGGTTGTGCTTCACGGAGCT	PCR check for integration and pL6 episomes, rhoph2 glmS and C-terminal 3HA-DDD tag	R
P36	TTCCGATATTTTCTCCAGAGAAAAAG	PCR check for wild-type and integration, rhoph3 glmS and C-terminal 3HA-DDD tag	F
P37	CACTAGTAGATGCAGCACTTGTACT	PCR check for wild-type, rhoph3 glmS and C-terminal 3HA-DDD tag	R
P38	GTGCTCGCGGCCGACGTGGA	PCR check for integration and pL6 episomes, rhoph3 glmS and C-terminal 3HA-DDD tag	R
P39	CTCCTTCAGTAGATATGACCGTAAA	PCR check for wild-type and integration, 13F10 HSP101-DDD	F
P40	ACACATACGATTTAGGTGACACTATA	PCR check for episomes, 13F10 HSP101-DDD	F
P41	TTCTTTTAAATTATACAACCCATGTTATA	PCR check for wild-type, 13F10 HSP101-DDD	R
P42	GCTAACGCCGCAATCAGACTGAT	PCR check for integration and episomes, 13F10 HSP101-DDD	R
