# Supplementary figures and images for: Siguiendo al Tirón por La Rioja
Source: eLife journal article supplement (doi:10.7554/elife.23485), 2008-01-01

**A**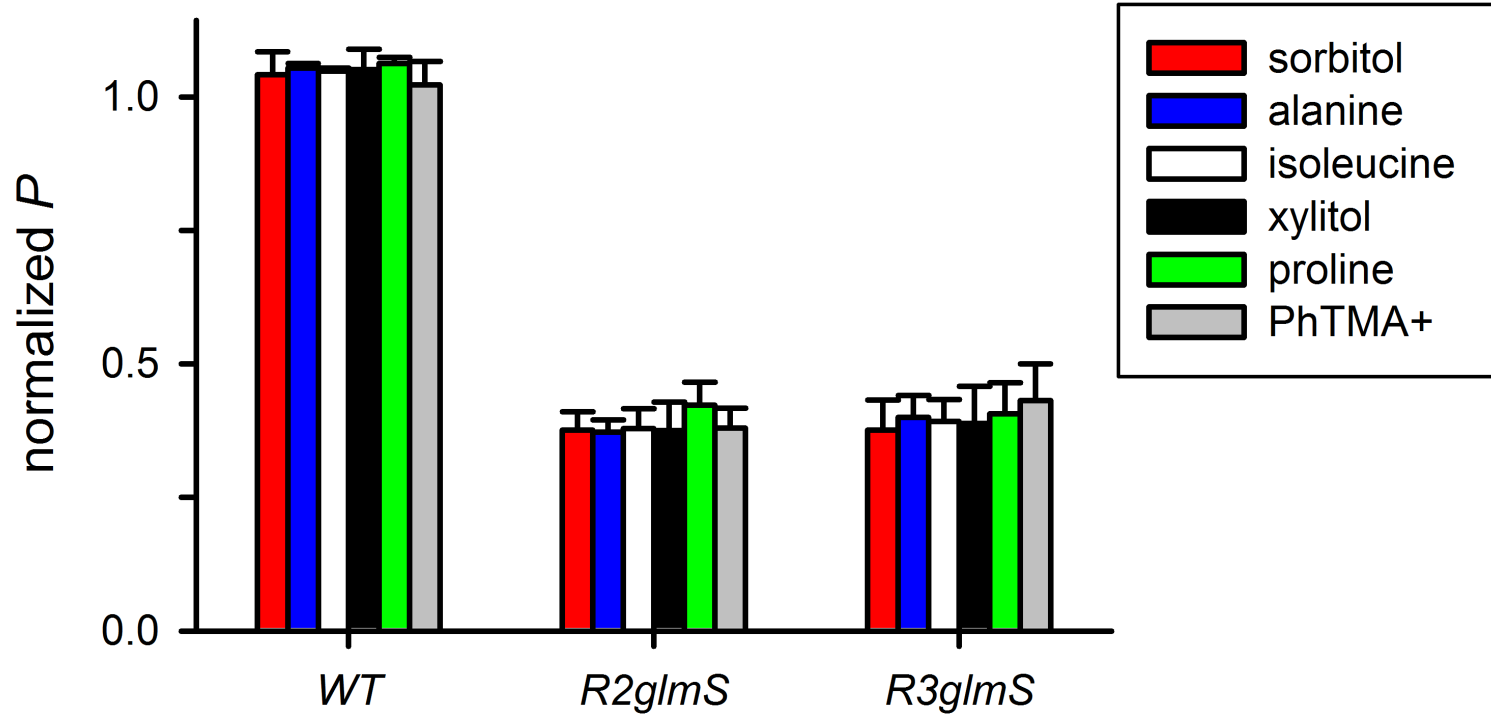**B**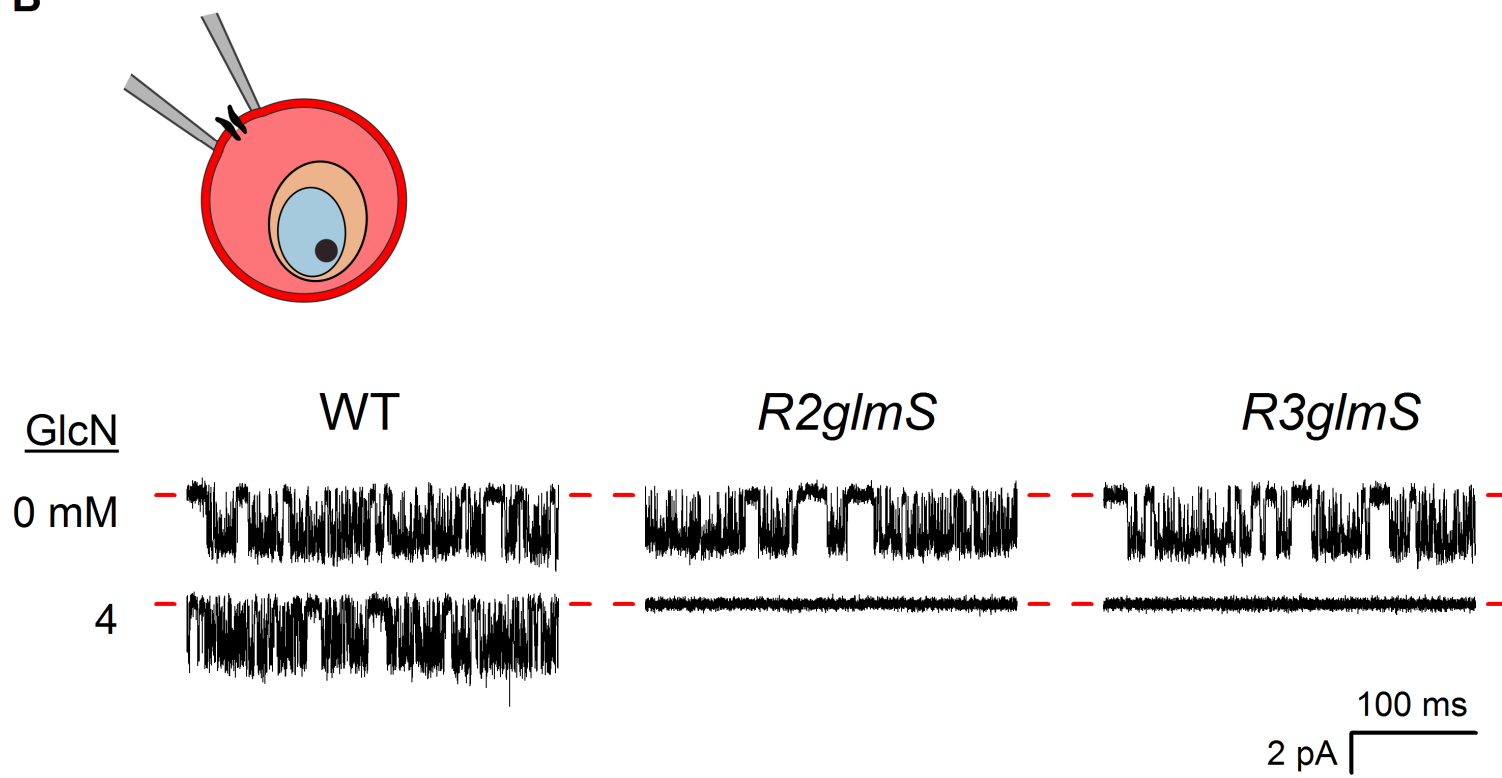

Supplement: supp [file elife-23485-supp-v1.zip]

**A**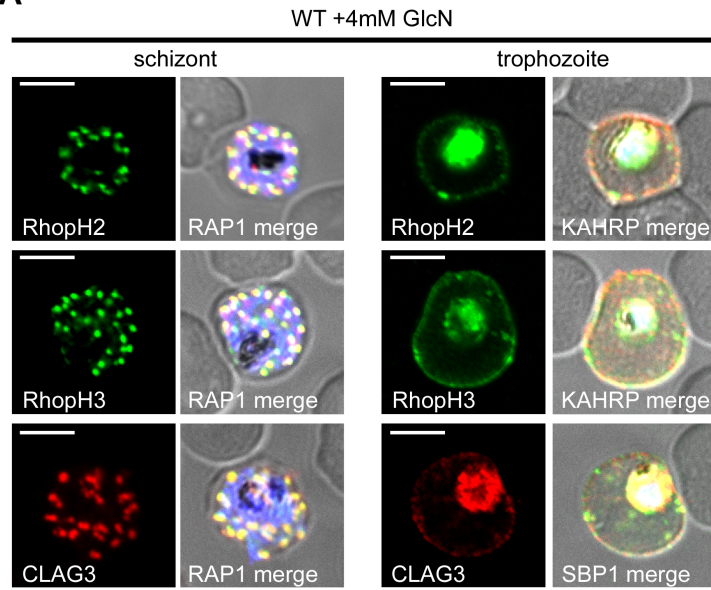**B**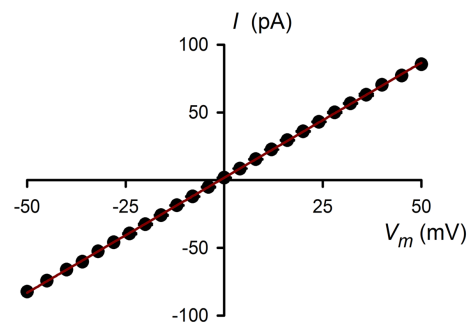**C**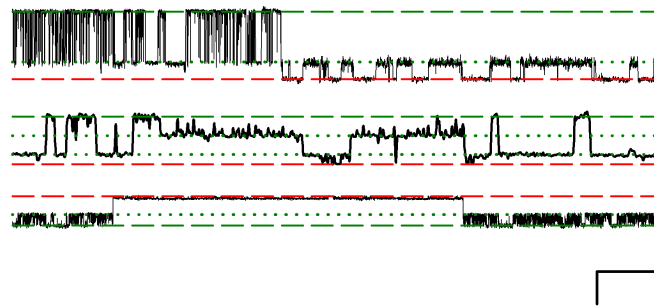**D**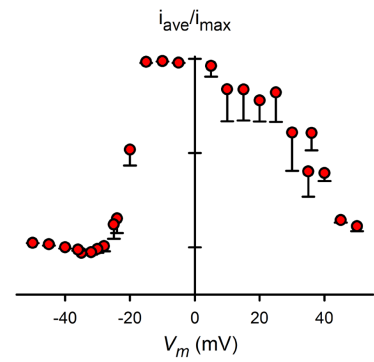

Supplement: supp [file elife-23485-supp-v1.zip]
